# Supplementary material for: Nanostructured, Metal-Free Electrodes for the Oxygen Reduction Reaction Containing Nitrogen-Doped Carbon Quantum Dots and a Hydroxide Ion-Conducting Ionomer
Source: MDPI journal article supplement (doi:10.3390/molecules27061832), 2022-03-11
Supplement: s1 [file s1]

## Supporting information

### Nanostructured, metal-free electrodes for the oxygen reduction reaction containing nitrogen-doped carbon quantum dots and a hydroxide ion-conducting ionomer

*A. R. Nallayagari*<sup>1,2</sup>, *E. Sgreccia*<sup>2</sup>, *M. L. Di Vona*<sup>\*2</sup>,  
*L. Pasquini*<sup>1</sup>, *F. Vacandio*<sup>1</sup>, *P. Knauth*<sup>\*1</sup>

<sup>1</sup> Aix Marseille Univ, CNRS, MADIREL (UMR 7246) and International Laboratory: Ionomer Materials for Energy, Campus St Jérôme, 13013 Marseille, France

<sup>2</sup> University of Rome Tor Vergata, Dep. Industrial Engineering and International Laboratory: Ionomer Materials for Energy, 00133 Roma, Italy

#### *Capacitance measurements*

The cyclovoltammograms in the non-Faradaic region are reported for various electrodes in Figures S1-S3.

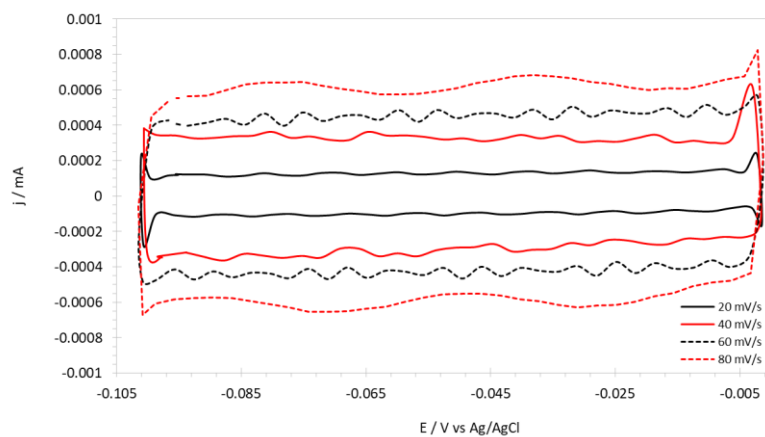

Figure S1. Carbon paper

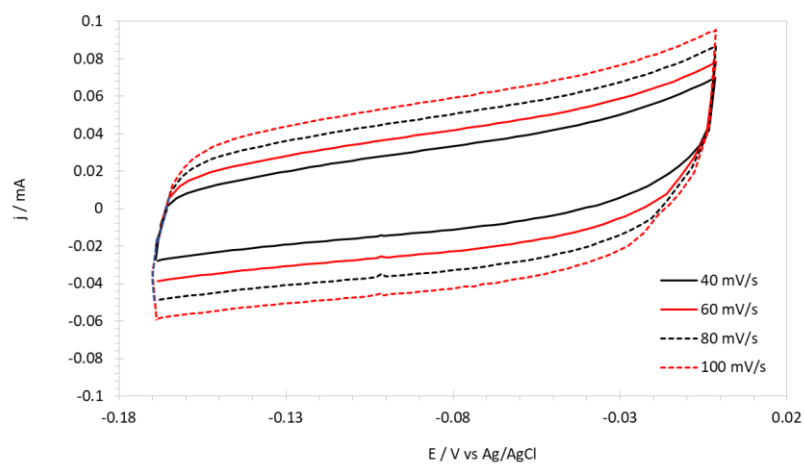

Figure S2. PSU-TMA+PANI+GAH

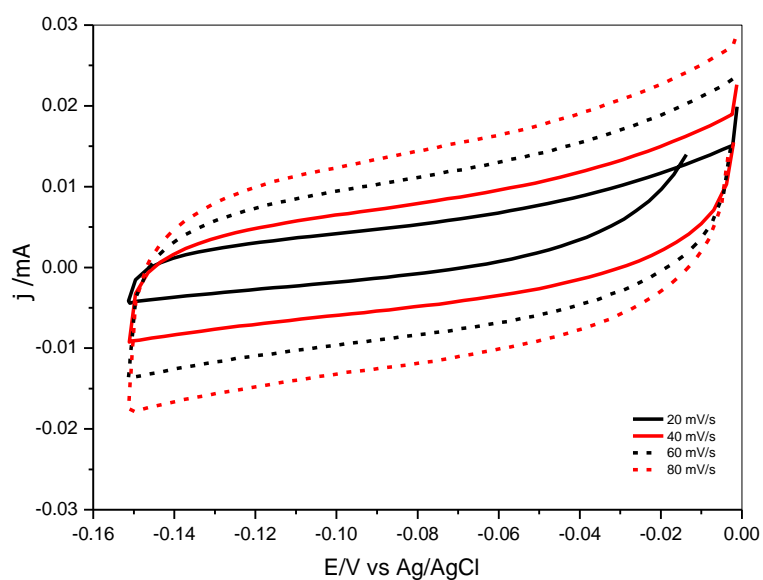

Figure S3. PSU-TMA+PANI+GAH-Oct

### *Linear sweep voltammetry*

Linear scan voltammograms (20 mV/s) are reported in Fig. S4-S7 for various electrodes in O<sub>2</sub>-saturated 1 M KOH solution with various rotating rates.

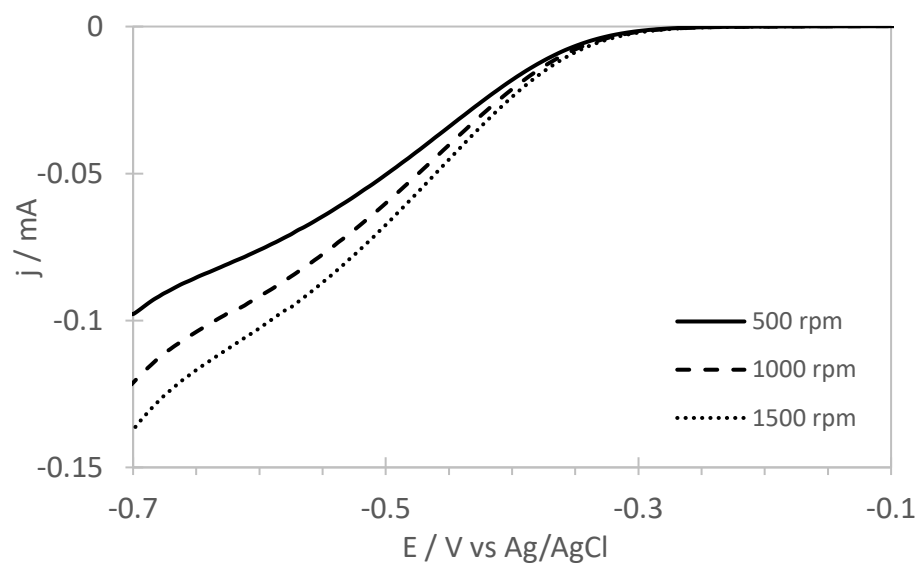

Figure S4. Carbon paper

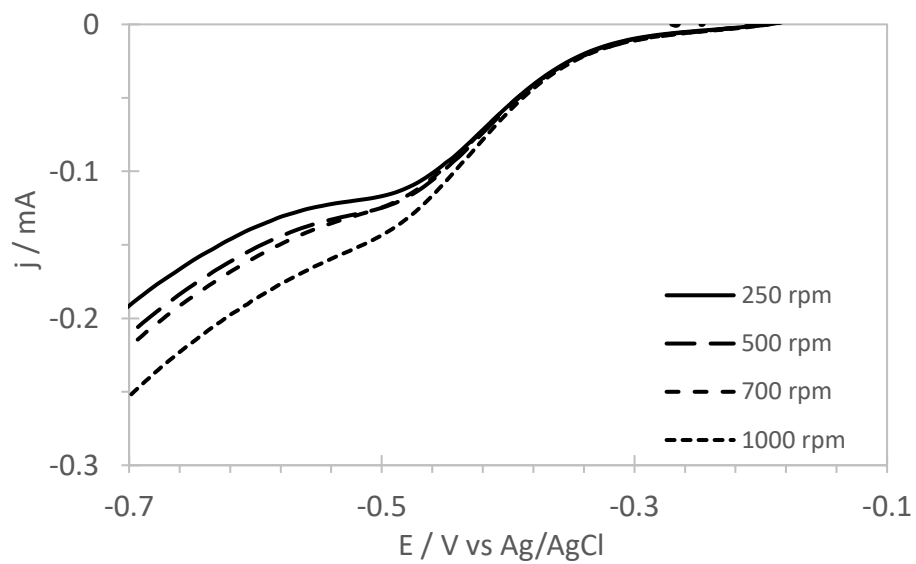

Figure S5. PANI+GAH-Oct

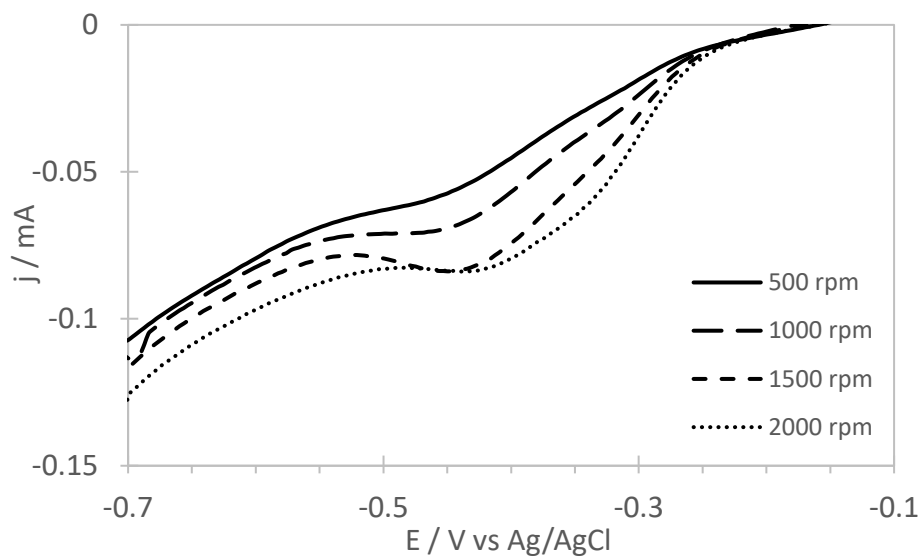

Figure S6. PSU-TMA+PANI+GAH

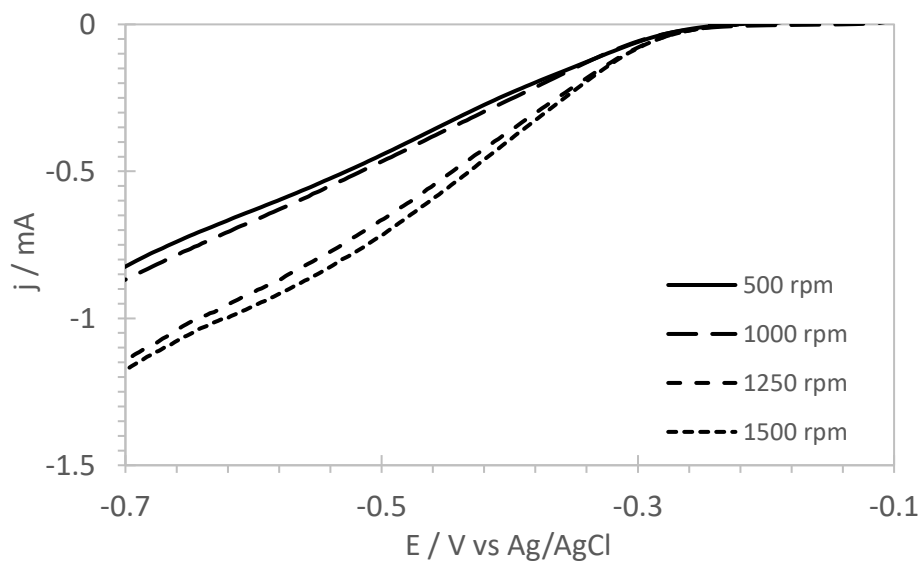

Figure S7. PSU-TMA+PANI+GAH-Oct fibres.

### FTIR spectra

The FTIR spectra for various electrodes are reported in Fig. S8-S10 before and after the ORR in alkaline solution.

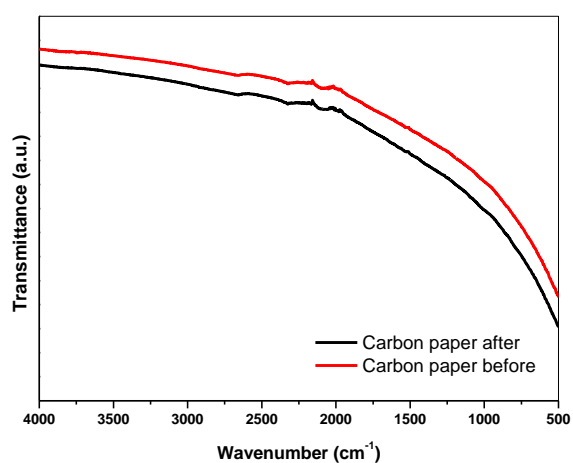

Figure S8. Carbon paper

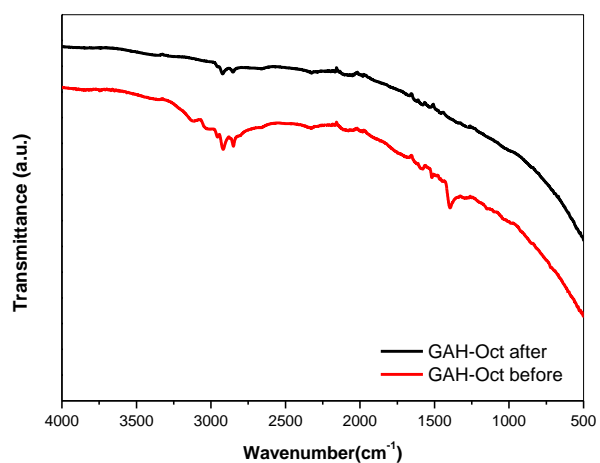

Figure S9. GAH-Oct

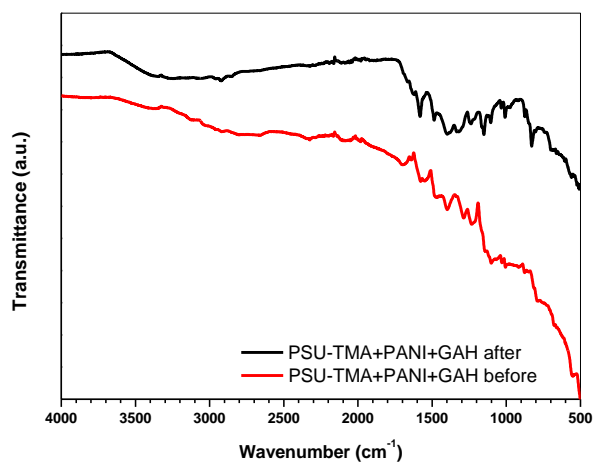

Figure S10. PSU-TMA+PANI+GAH
